# Supplementary material for: Protective Efficacy of a Chimeric Insect-Specific Flavivirus Vaccine against West Nile Virus
Source: PubMed Central journal article supplement (PMC7349994; doi:10.3390/vaccines8020258), 2020-05-29
Supplement: vaccines-08-00258-s001.pdf [file vaccines-08-00258-s001.pdf]

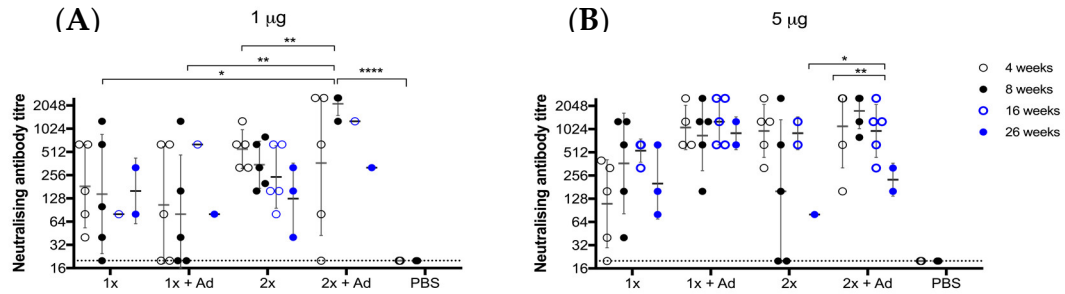

**Figure S1.** Vaccination of adult male and female CD1 mice with BinJ/WNV<sub>KUN</sub>-prME with and without Advax<sup>TM</sup> (Ad). Adult CD1 mice ( $n = 5$ ) were immunized subcutaneously on the rump with purified BinJ/WNV<sub>KUN</sub>-prME in PBS. Geometric mean of neutralizing antibody titres 16- and 26-weeks after vaccination with 1 µg (A) or 5 µg (B) purified BinJ/WNV<sub>KUN</sub>-prME. Antibody levels were measured by micro-neutralization assay with wildtype virus strain WNV<sub>KUN</sub> on Vero cells. Error bars represent SD of the geometric mean. Statistical analysis was performed using multiple *t*-test (\*  $p < 0.0032$ , \*\*  $p < 0.0021$ , \*\*\*  $p < 0.0002$ , \*\*\*\*  $p < 0.0001$ ).
